# Supplementary material for: Maceration of Extra Virgin Olive Oil with Common Aromatic Plants Using Ultrasound-Assisted Extraction: An UV-Vis Spectroscopic Investigation
Source: Hindawi journal article supplement (doi:10.1155/2018/7510647), 2018-01-01
Supplement: f1 [file 7510647.f1.docx]

**Maceration of extra-virgin olive oil with common aromatic plants using ultra-sound assisted extraction – an UV-Vis spectroscopic investigation**

Ozren Jović,* Iva Habinovec, Nives Galić, Marijan Andrašec

Department of Chemistry, Faculty of Science, University of Zagreb, Horvatovac 102A, HR-10000 Zagreb, Croatia.

* Corresponding author’s e-mail address: ozren.jovic@chem.pmf.hr

keywords: UV-Vis, maceration, aromatic plants, ultra-sound, extra-virgin olive oil

**SUPPORTING INFORMATION**

**
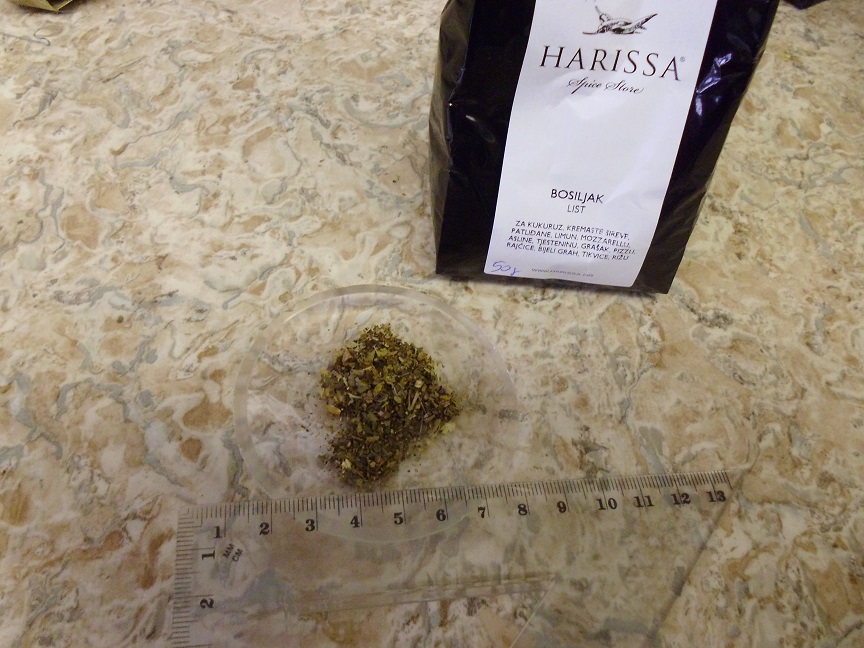
**

**
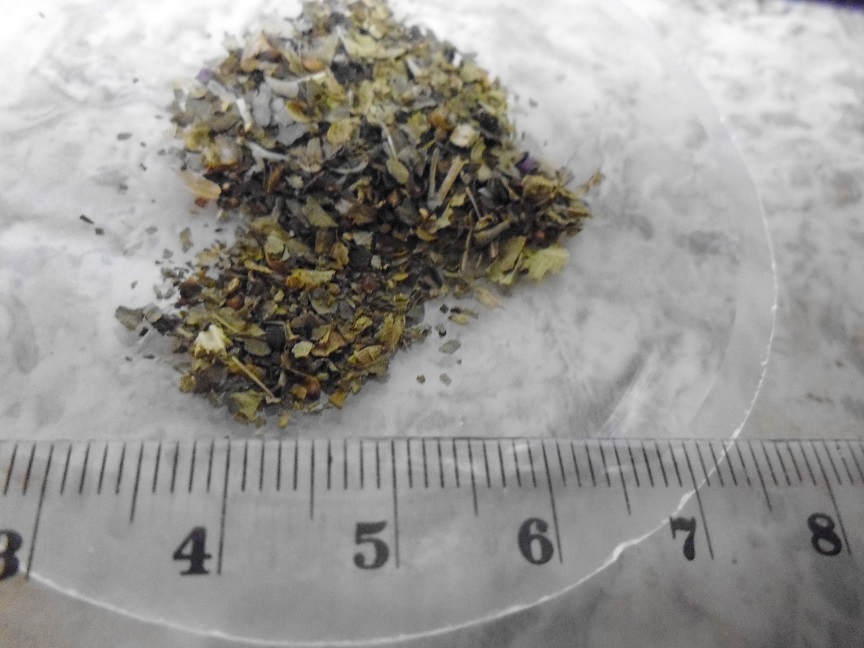
**

**Picture S1.** Basil leaves, *Ocimum basilicum*, view of used sample (scale is in centimeters).

**
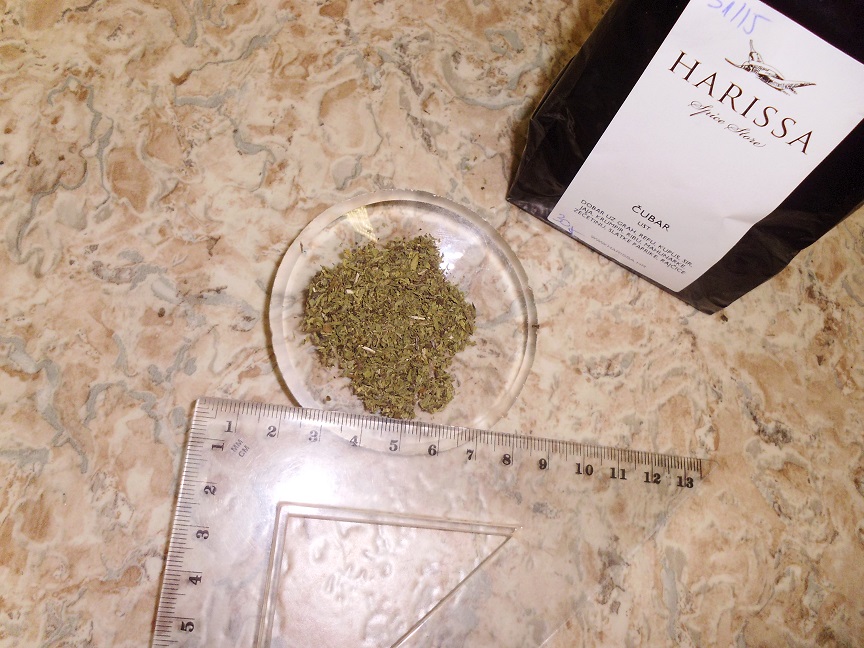
**

**
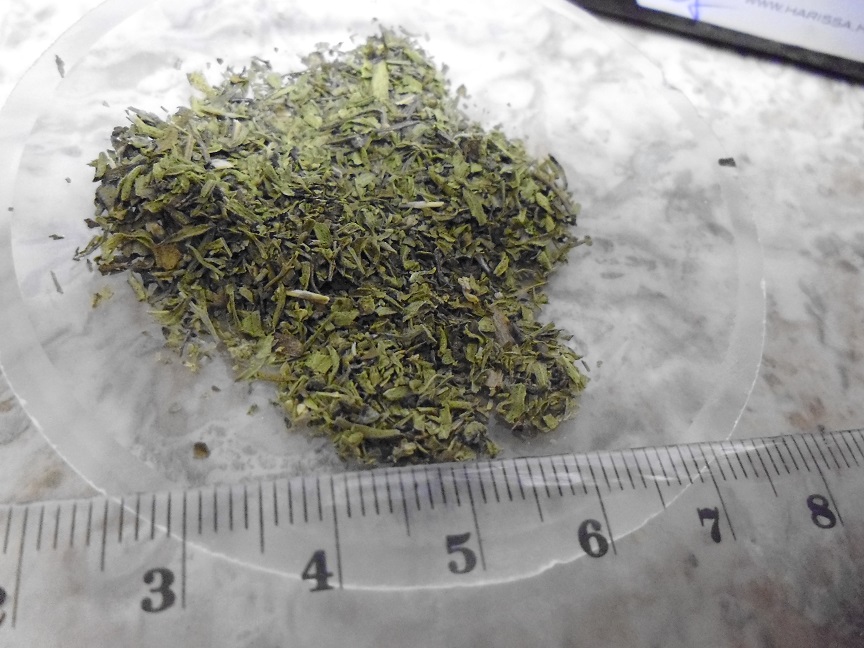
**

**Picture S2.** Summer savory leaves, *Satureja hortensis*, view of used sample (scale is in centimeters).

**
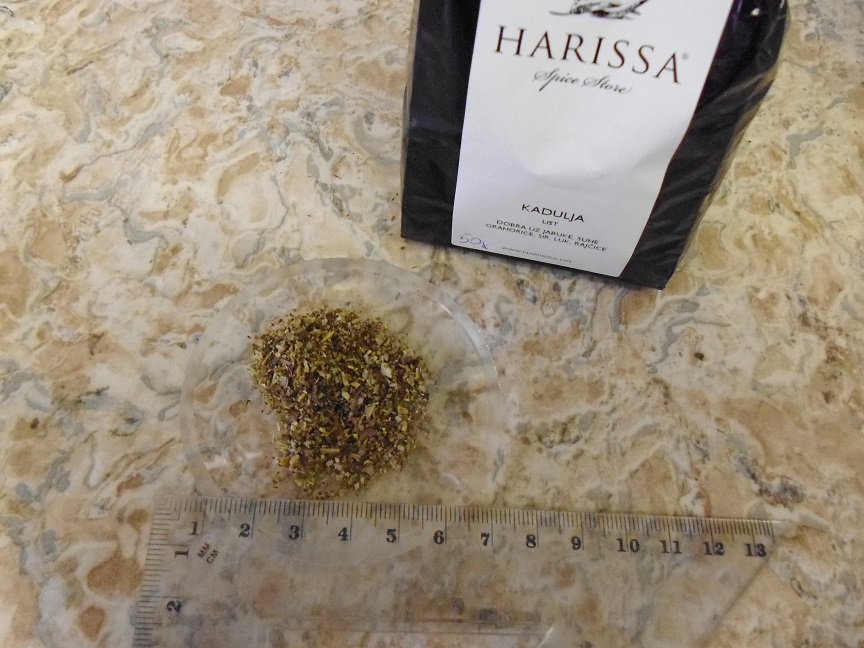
**

**
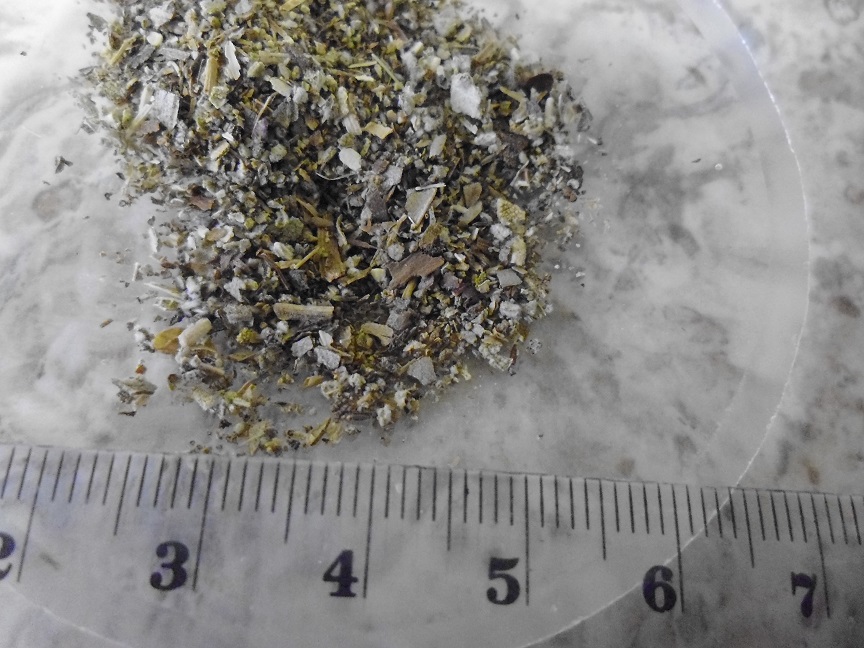
**

**Picture S3.** Garden sage leaves, *Salvia officinalis*, view of used sample (scale is in centimeters).

**
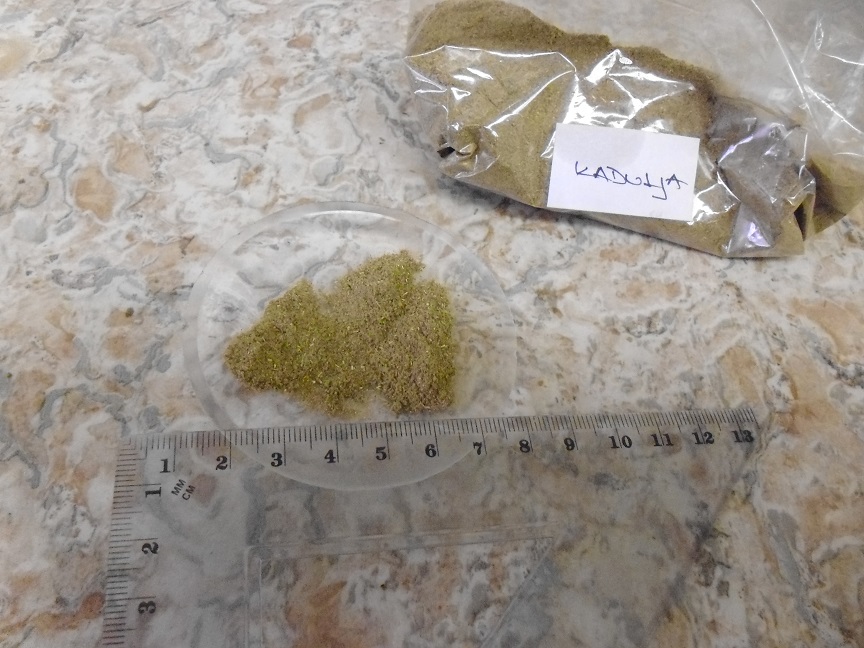
**

**
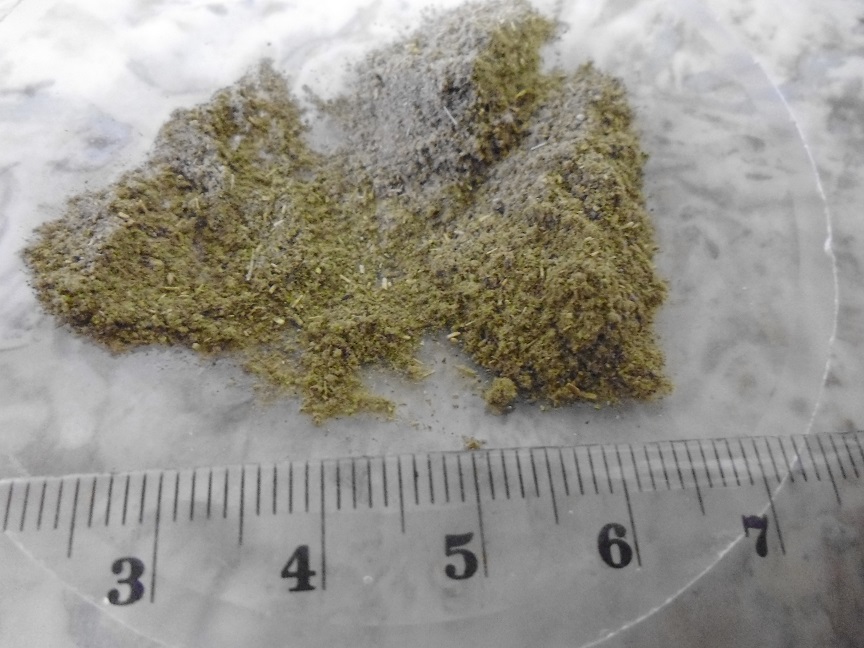
**

**Picture S4.** Garden sage powder, *Salvia officinalis*, view of used sample (scale is in centimeters).

**
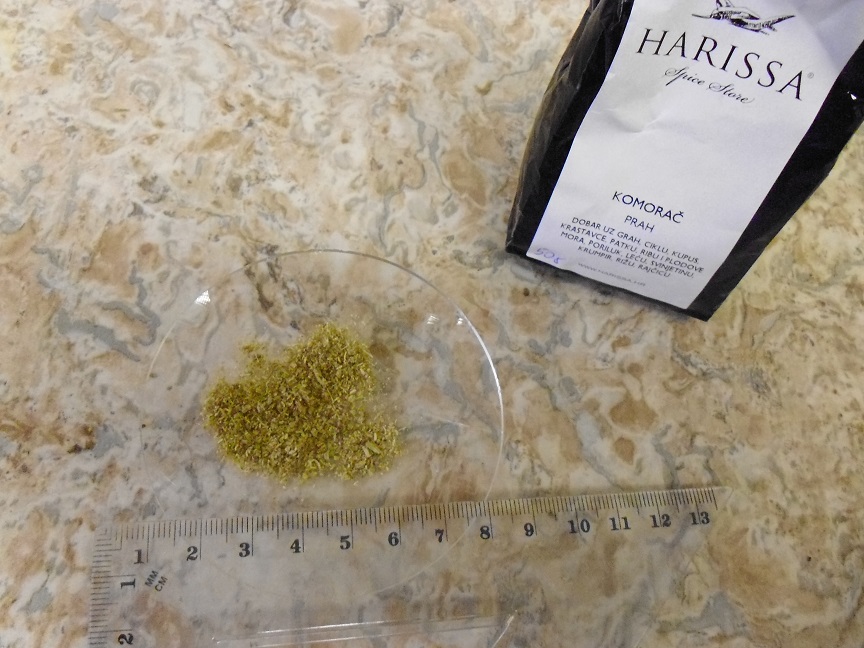
**

**
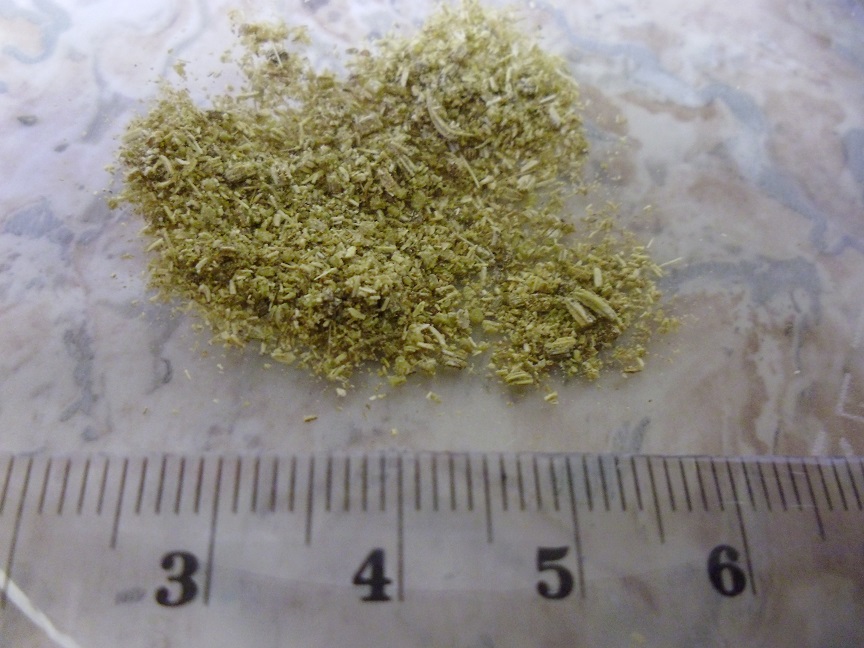
**

**Picture S5.** Common fennel powder, *Foeniculum vulgare*, view of used sample (scale is in centimeters).

**
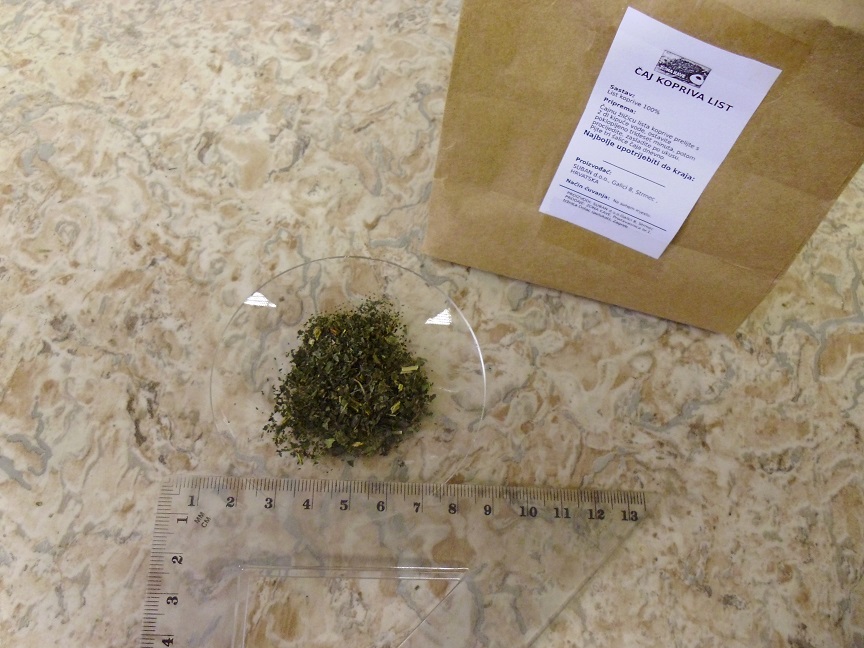
**

**
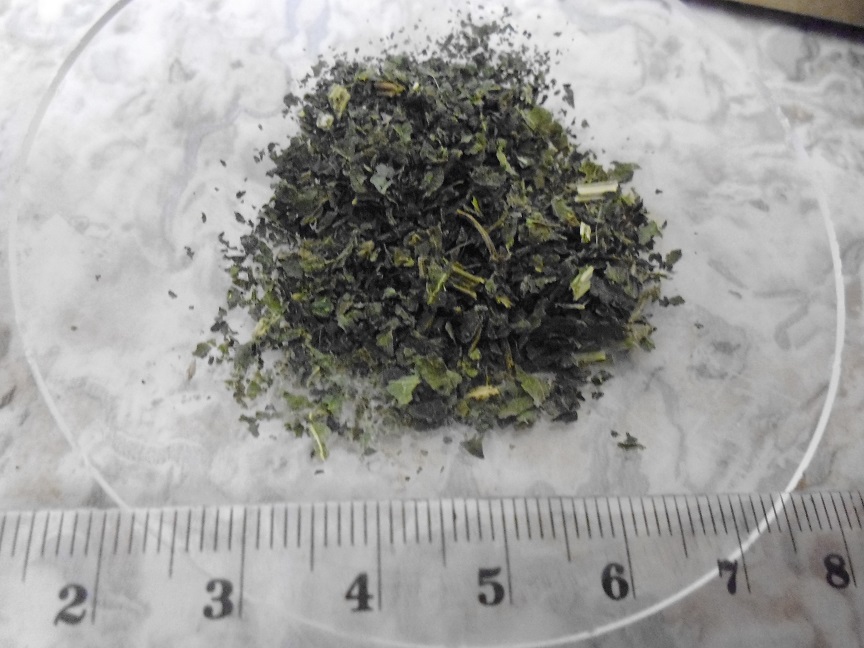
**

**Picture S6.** Nettle leaves, *Urtica diocia*, view of used sample (scale is in centimeters).

**
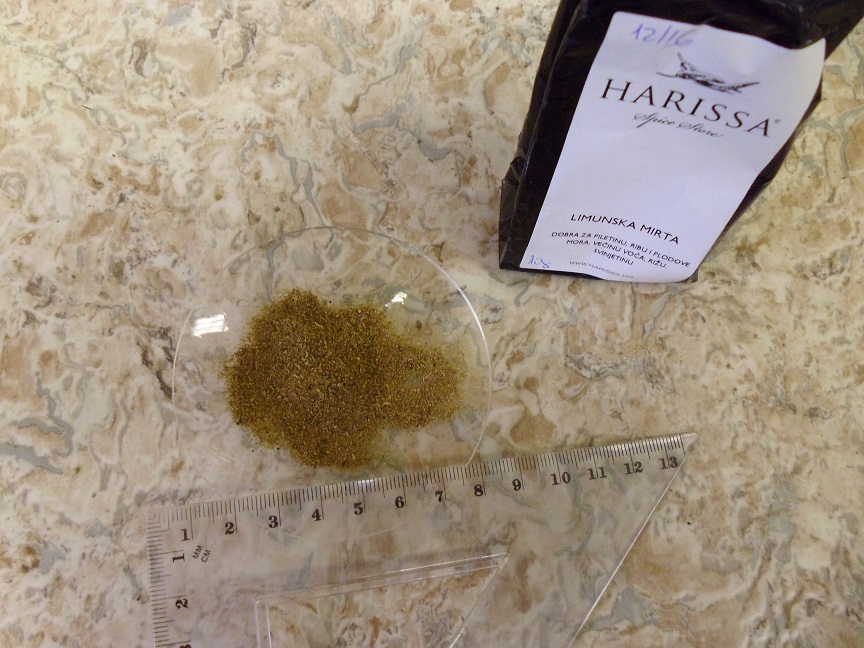
**

**
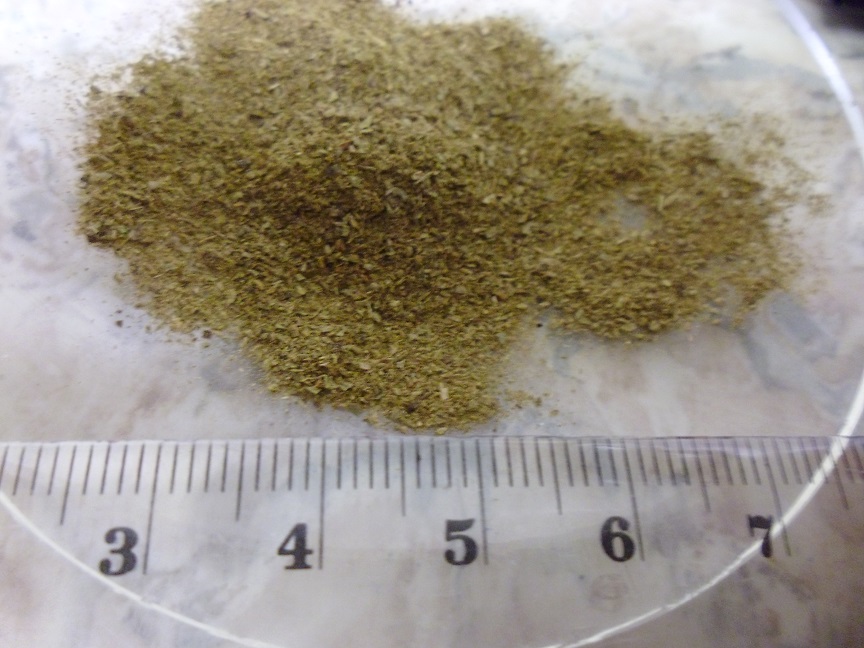
**

**Picture S7.** Lemon myrtle powder, *Backhousia citriodora*, view of used sample (scale is in centimeters).

**
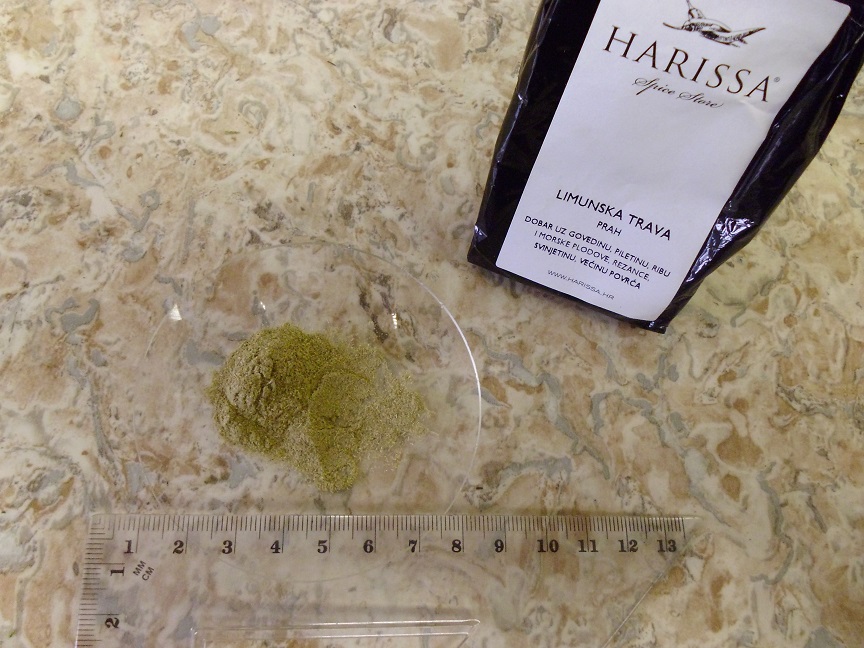
**

**
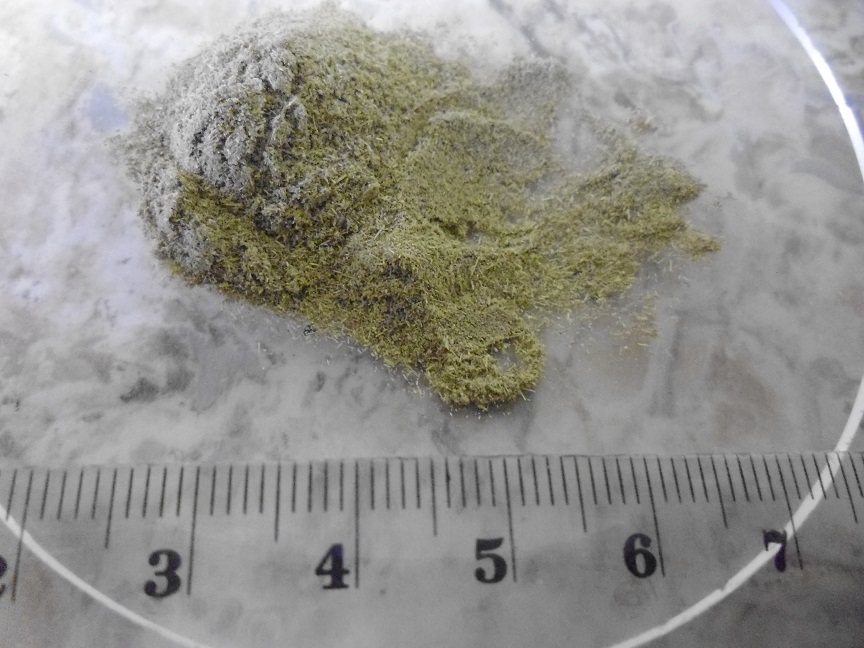
**

**Picture S8.** Lemon grass powder, *Cymbopogon citratus*, view of used sample (scale is in centimeters).

**
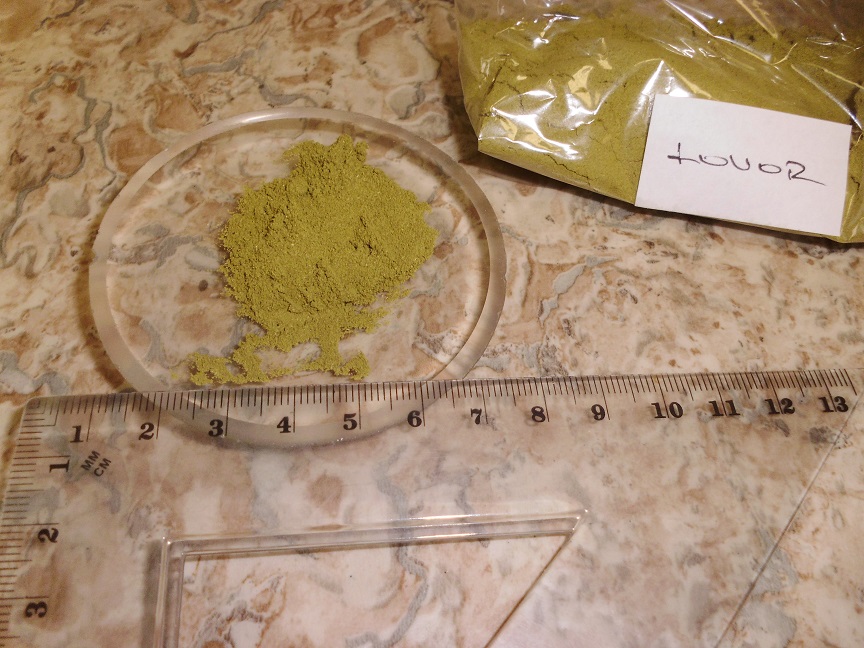
**

**
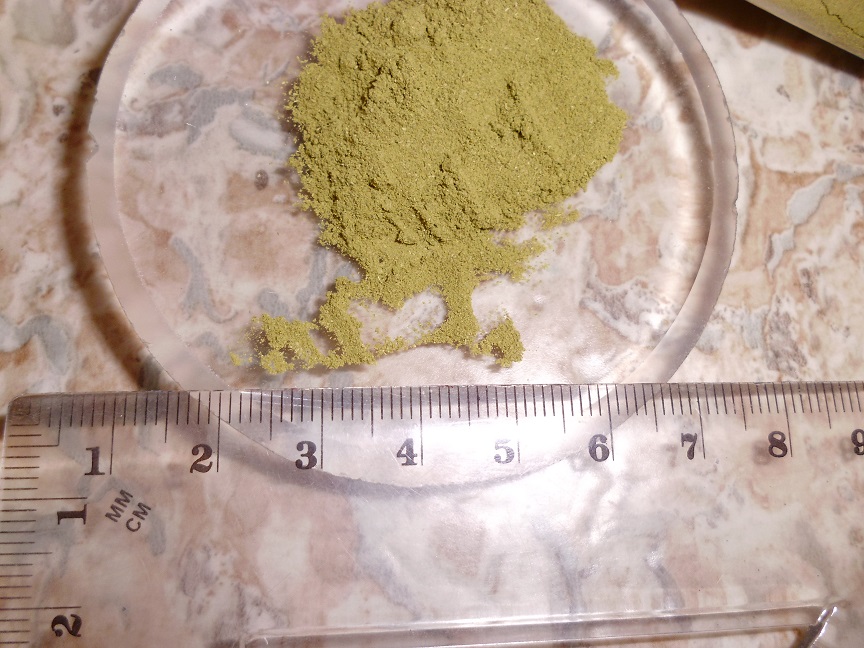
**

**Picture S9.** Laurel powder, *Laurus nobilis*, view of used sample (scale is in centimeters).

**
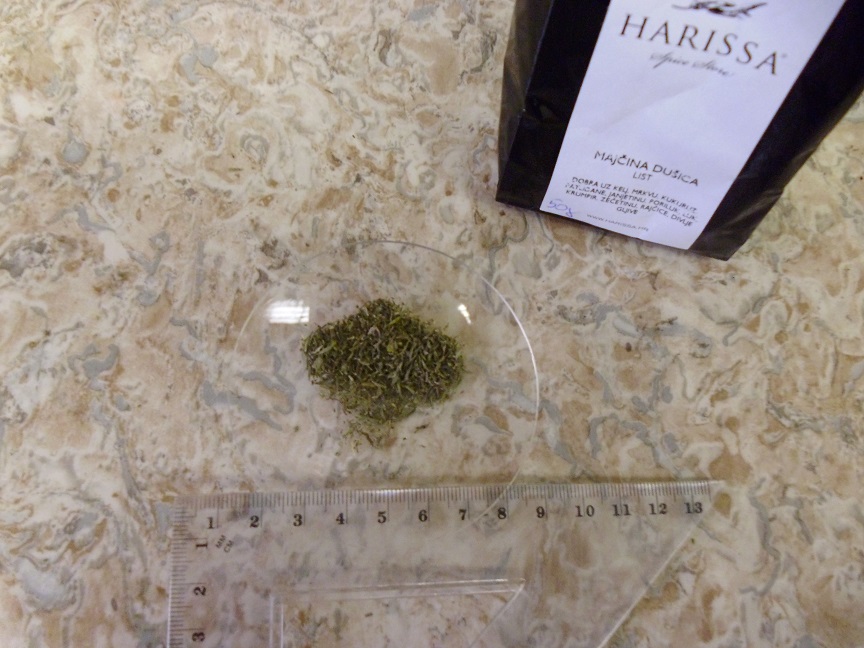
**

**
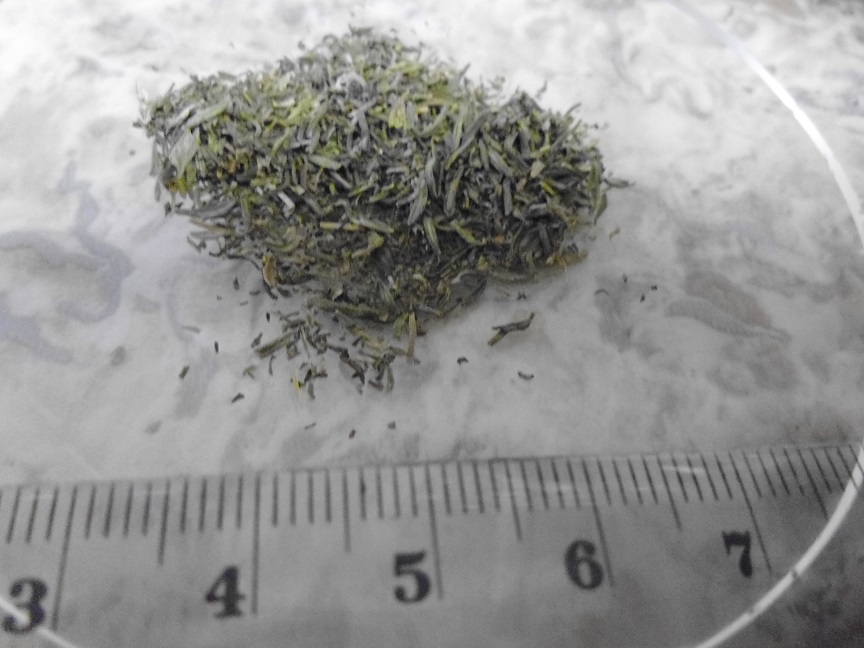
**

**Picture S10.** Wild thyme leaves, *Thymus serpyllum*, view of used sample (scale is in centimeters).

**
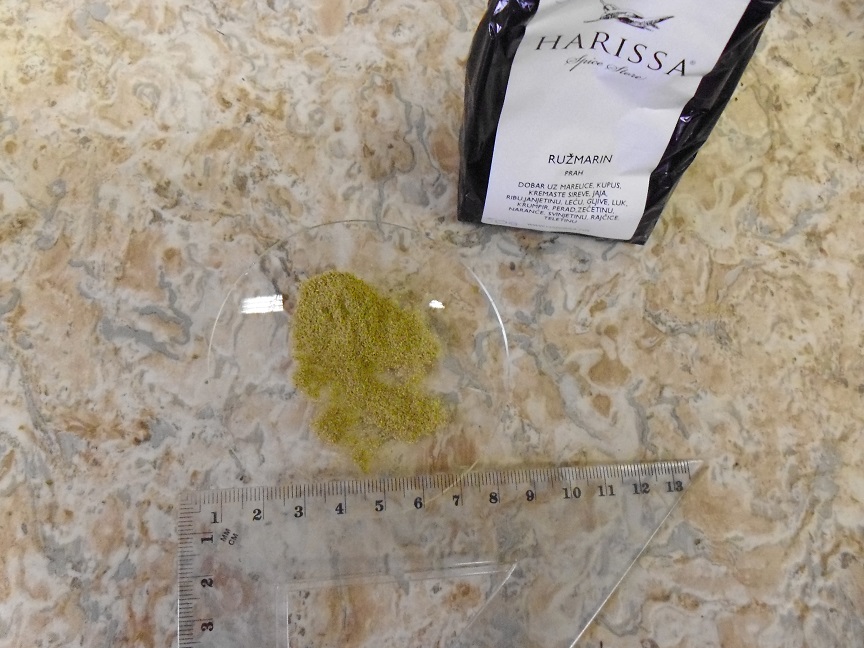
**

**
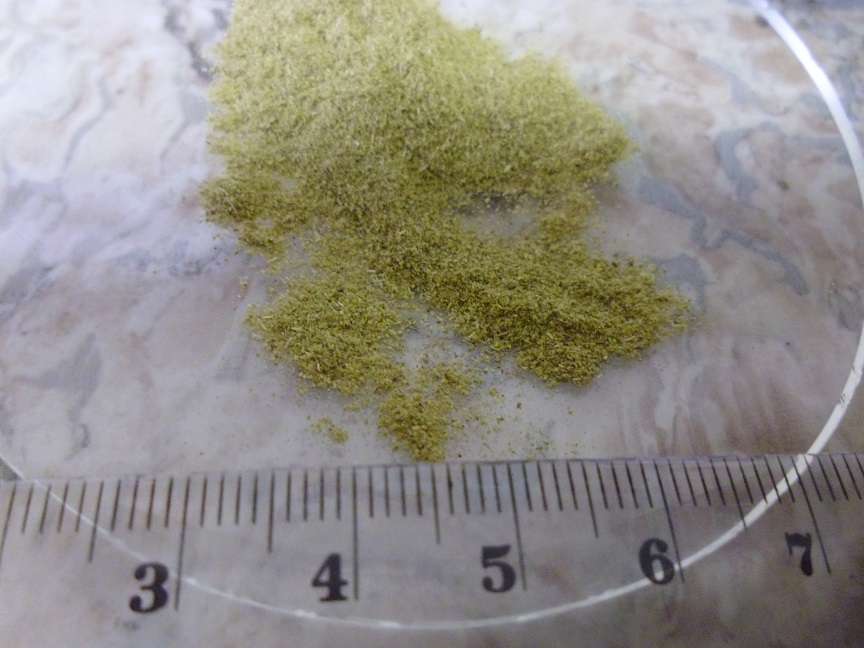
**

**Picture S11.** Rosemary powder, *Rosmarinus officinalis*, view of used sample (scale is in centimeters).


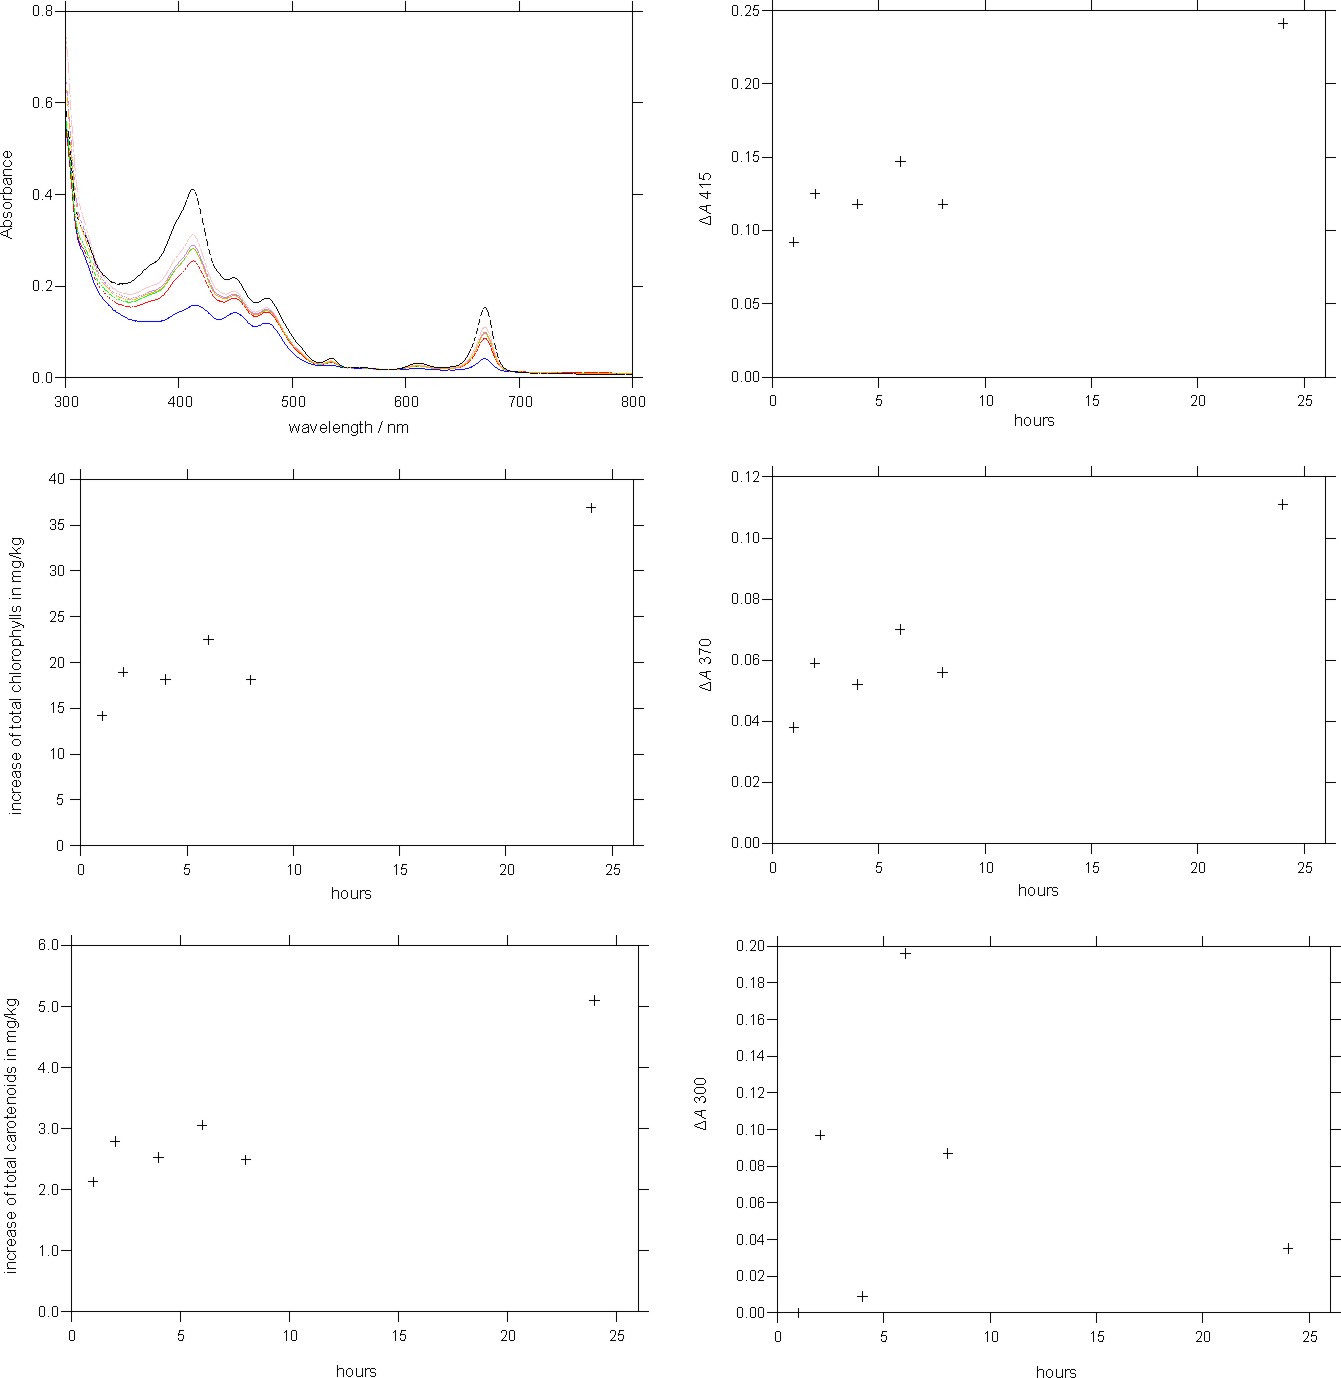


**Figure S1**. Summer savory conventional maceration, results of UV-vis measurements.


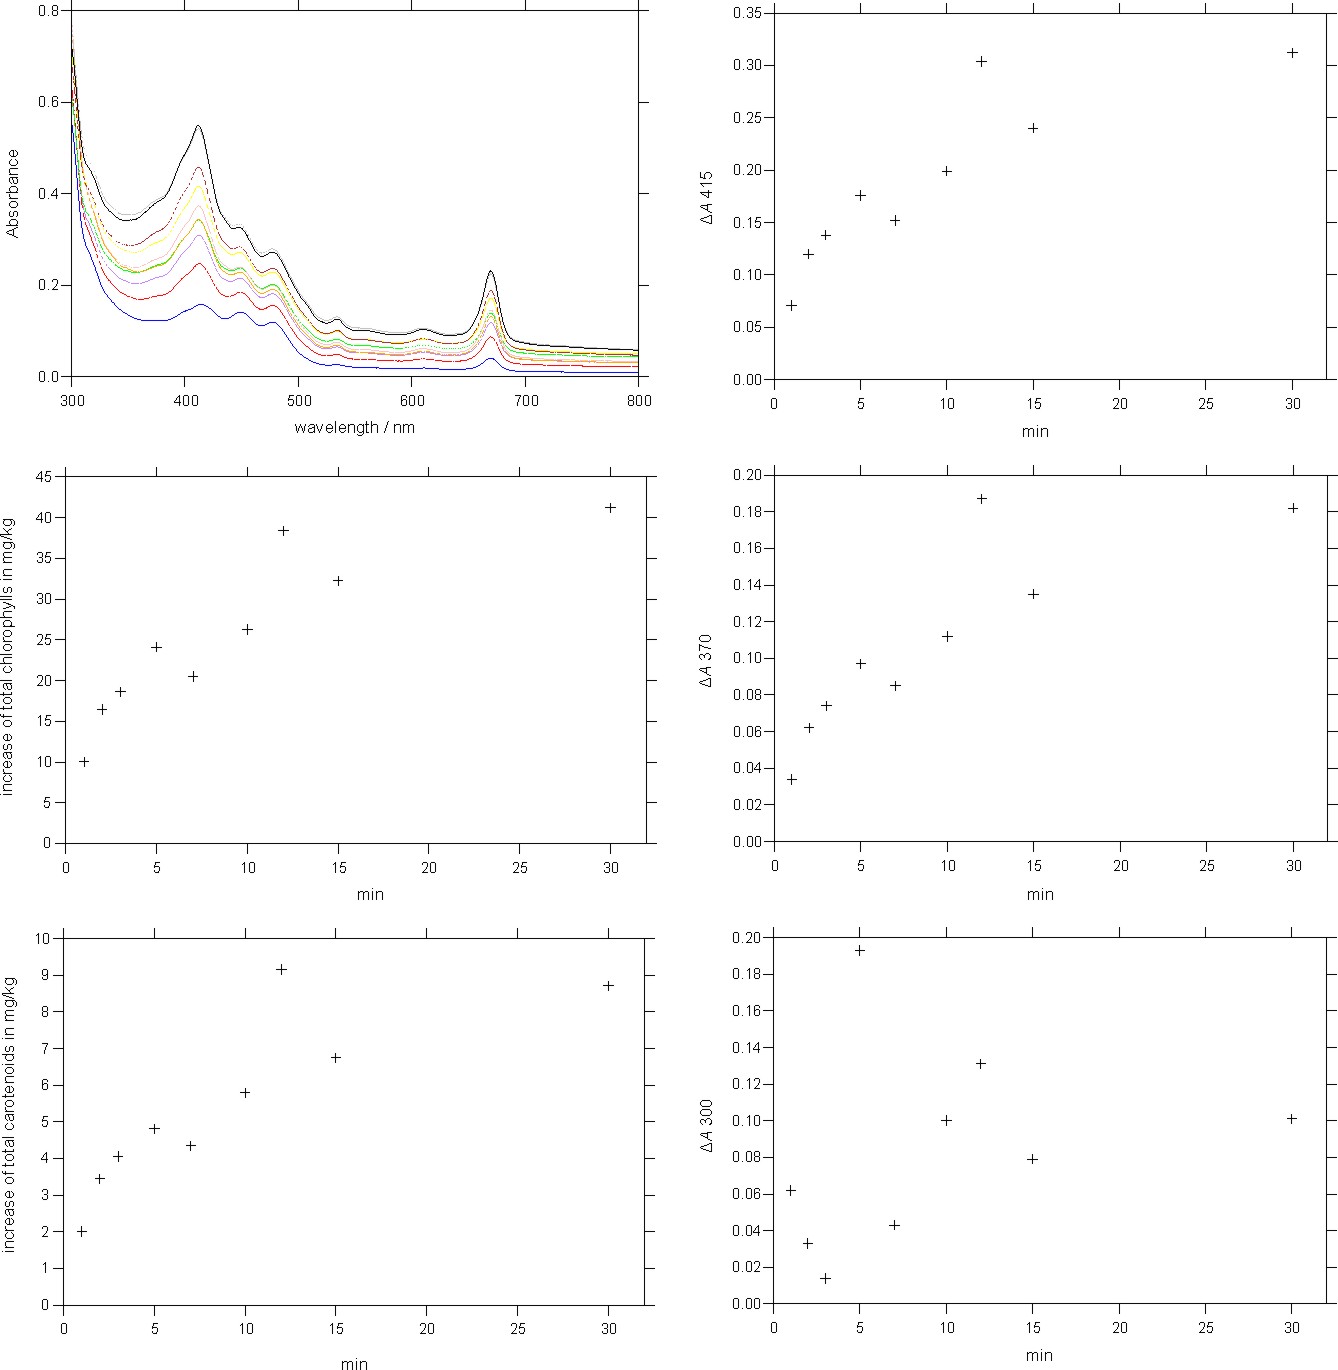


**Figure S2.** Summer savory ultra-sound maceration, results of UV-vis measurements. For comparison with conventional maceration see figure 1.
